# Supplementary material for: Room-Temperature Synthesis of Tubular Hexagonal Boron Nitride under Pressure
Source: MDPI journal article supplement (doi:10.3390/cryst13081201), 2023-08-02
Supplement: s1 [file s1]

## Supporting information

# Room-Temperature Synthesis of Hexagonal Boron Nitride under Pressure

Junkai Li \*, Donghan Jia, Guoliang Niu, Peiyang Mu, Huiyang Gou

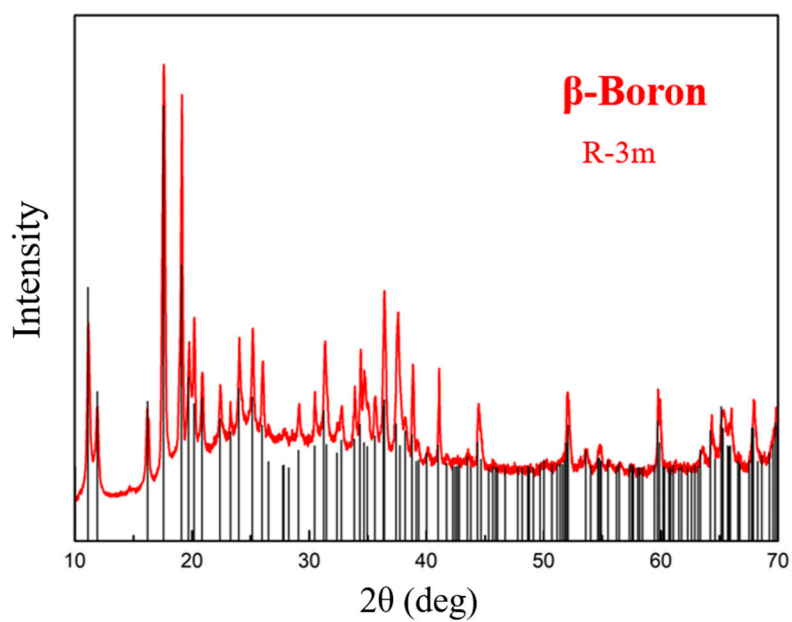

Figure S1. XRD pattern of nano boron powder.

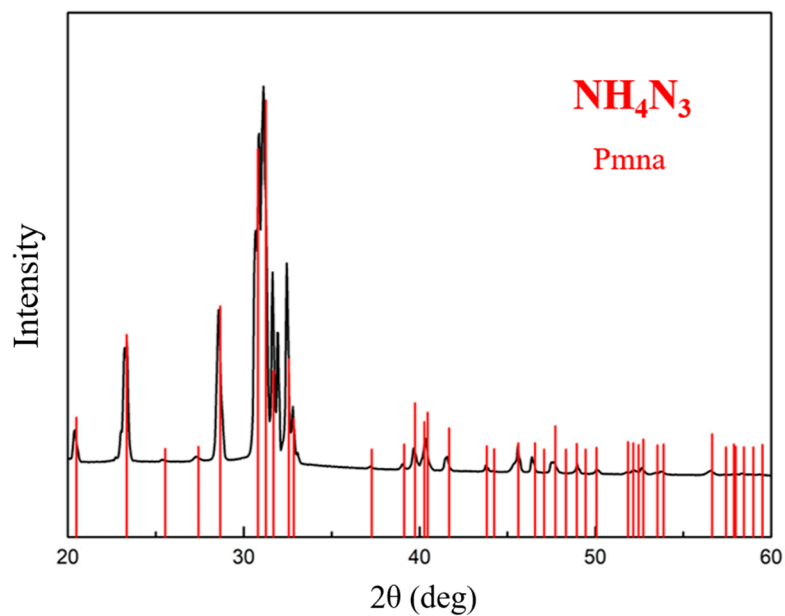

Figure S2. XRD pattern of ammonium azide.

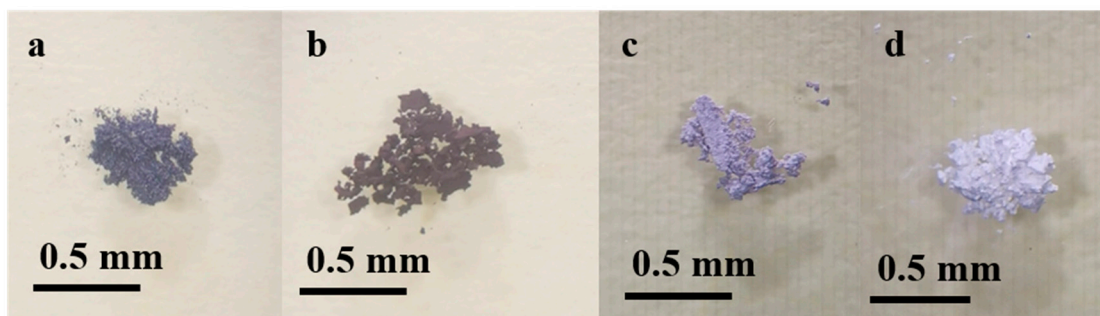

**Figure S3.** optical photos of samples and precursors. (a) nano boron powder; (b) sample obtained at 28 GPa and room temperature; (c) sample obtained at 28 GPa and 200 °C; (d) commercial h-BN.

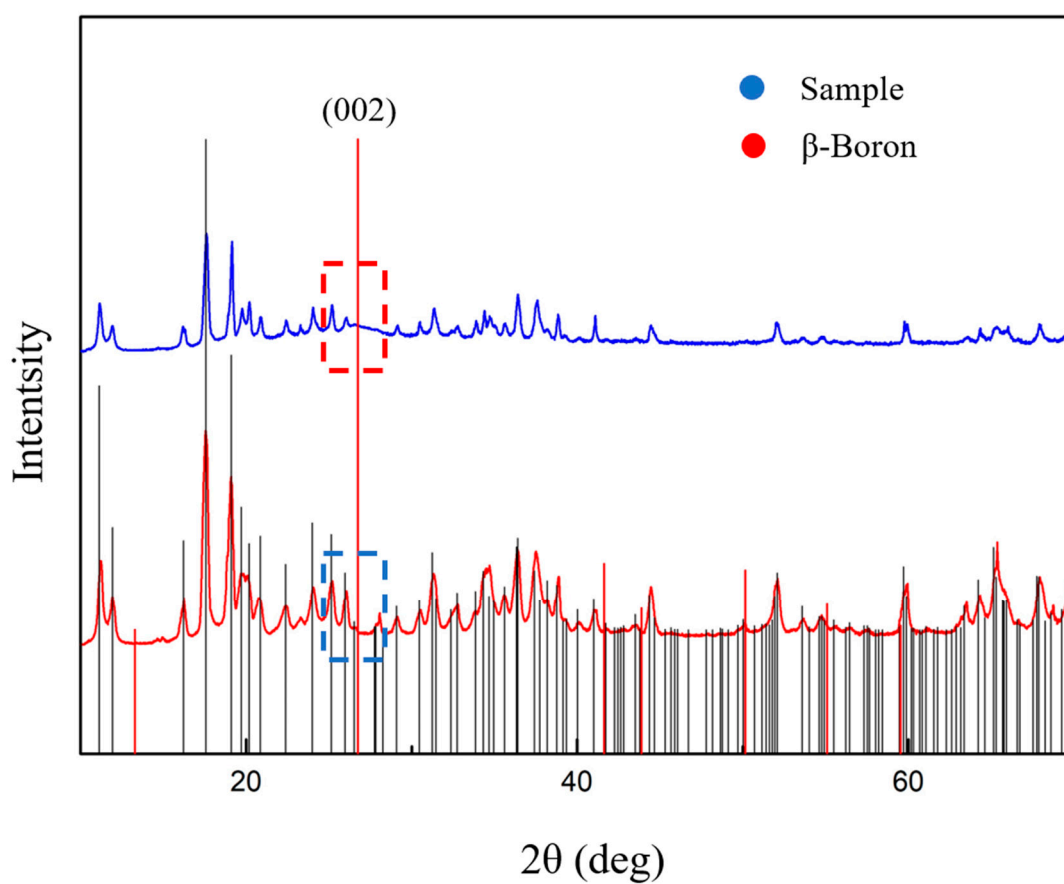

**Figure S4.** XRD pattern of the sample obtained at 28 GPa room temperature.

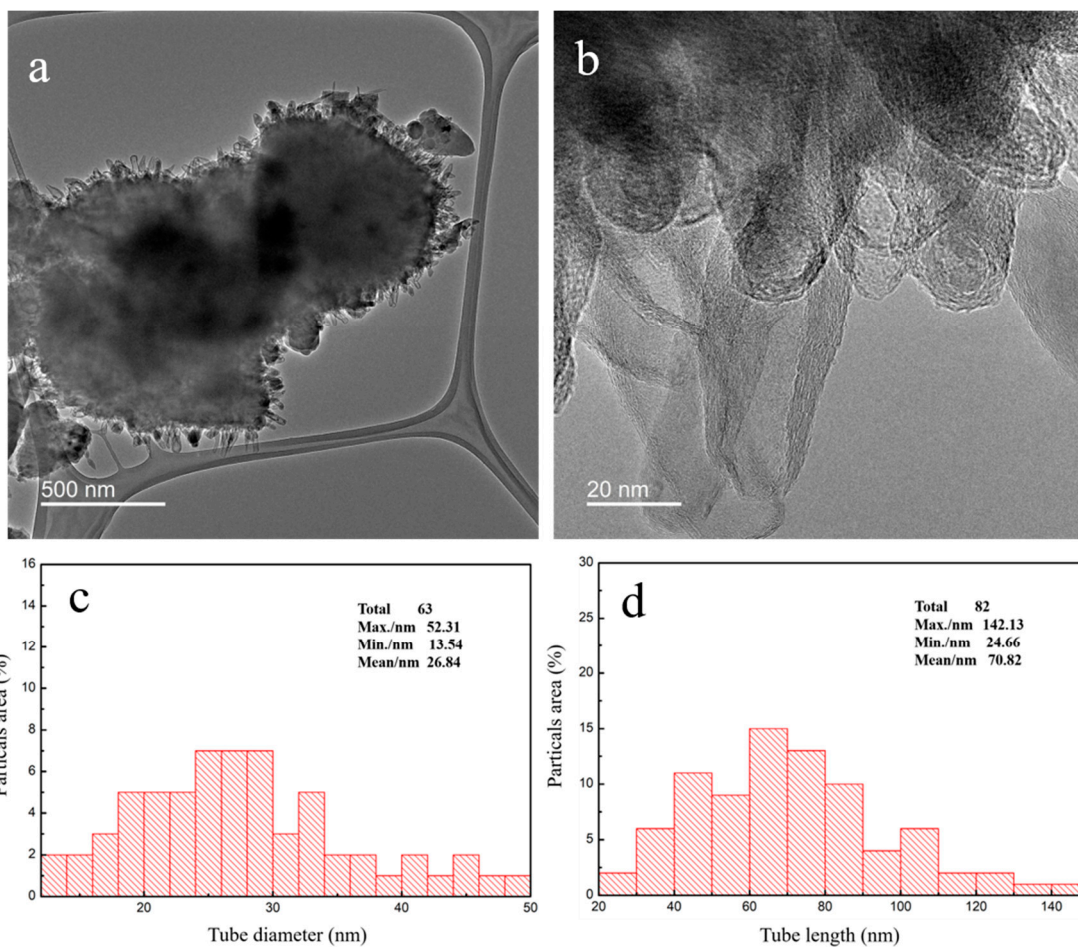

**Figure S5.** (a, b) TEM images and size statistics (c, d) of tube-shaped h-BN for the sample obtained from 28 GPa and room temperature.

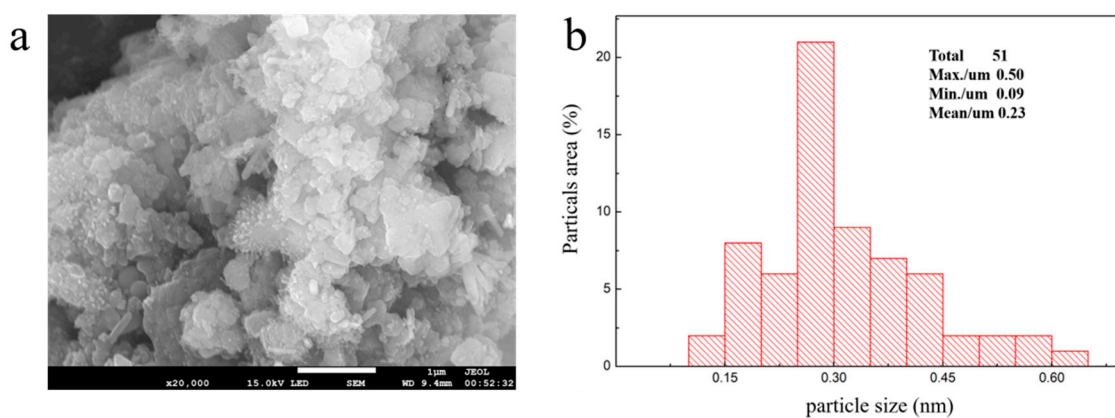

**Figure S6.** (a) SEM images and size statistics (b) of boron particles for the sample obtained from 28 GPa and room temperature.

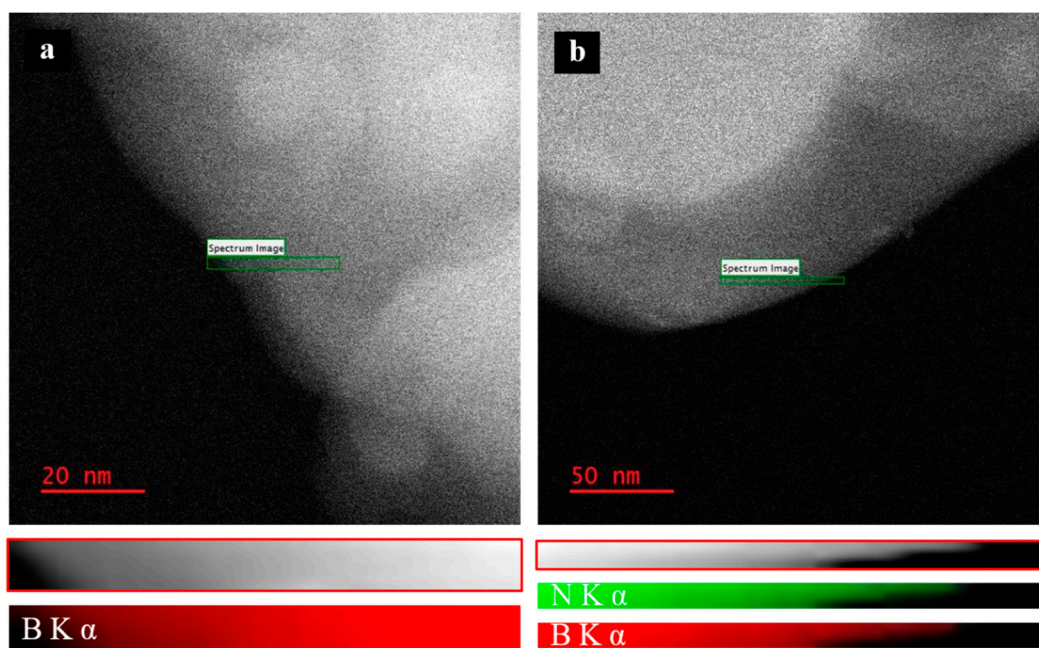

**Figure S7.** (a) Electron energy loss spectrum (EELS) mapping of nano boron powder and (b) commercial h-BN.

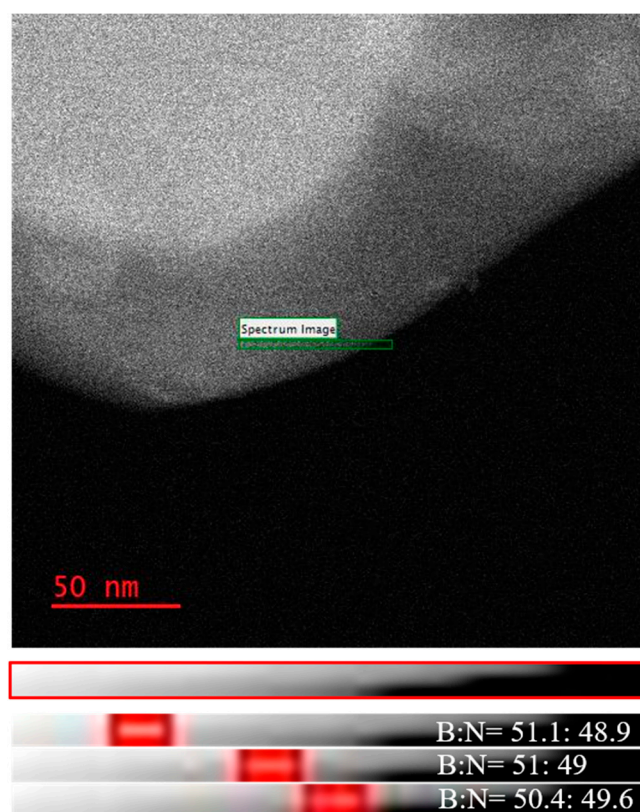

**Figure S8.** Quantitative analysis of EELS in different segments of commercial h-BN.

**Table S1.**TEM-EDS results at different areas of sample obtained from 28 GPa and room temperature.

| Different positions | Atomic ratio (B) | Atomic ratio (N) |
|---------------------|------------------|------------------|
| 1                   | 46.1%            | 53.9%            |
| 2                   | 47.7%            | 52.3%            |
| 3                   | 46.9%            | 53.1%            |
| 4                   | 90.7%            | 9.3%             |
| 5                   | 89.3%            | 10.7%            |
| 6                   | 91.1%            | 8.9%             |
