# Supplementary material for: Room-Temperature Synthesis of Tubular Hexagonal Boron Nitride under Pressure
Source: MDPI journal article supplement (doi:10.3390/cryst13081201), 2023-08-02
Supplement: s1 [file s1]

Archive with 1 entries (1 files):
- crystals-2522431-supplementary.pdf
